# Supplementary material for: Stepwise engineering ofSaccharomyces cerevisiaeto produce (+)-valencene and its related sesquiterpenes
Source: Royal Society of Chemistry journal article supplement (doi:10.1039/c9ra05558d), 2019-01-01
Supplement: c9ra05558d1.pdf [file c9ra05558d1.pdf]

**Table S1. The *de novo* (+)-nootkatone biosynthesis genes used in this study.**

| Gene         | Accession number | Description                                          | Origin                           |
|--------------|------------------|------------------------------------------------------|----------------------------------|
| <i>CnVS</i>  | JX040471         | valencene synthase                                   | <i>Callitropsis nootkatensis</i> |
| <i>HPO</i>   | EF569601.1       | premnaspirodiene oxygenase                           | <i>Hyoscyamus muticus</i>        |
| <i>mHPO</i>  |                  | <i>HPO</i> V482I, A484I                              |                                  |
| <i>CnVO</i>  | JX518290         | valencene oxidase                                    | <i>Callitropsis nootkatensis</i> |
| <i>AtCPR</i> | NM_118585.3      | cytochrome P450 reductase                            | <i>Arabidopsis thaliana</i>      |
| <i>ADH1</i>  | NC_001147        | alcohol dehydrogenase                                | CEN.PK2-1Ca                      |
| <i>ADH3</i>  | NC_001145        | alcohol dehydrogenase                                | CEN.PK2-1Ca                      |
| <i>tHMG1</i> | NM_001182434.1   | 3-hydroxy-3-methylglutaryl-coenzyme A reductase gene | CEN.PK2-1Ca                      |
| <i>ERG9</i>  | NC_001140.6      | squalene synthase                                    | CEN.PK2-1Ca                      |
| <i>ROX1</i>  | NC_001148.4      | oxygen-responsive repressor                          | CEN.PK2-1Ca                      |

**Table S2. Plasmids used in this study**

| <b>Plasmid</b> | <b>Characteristics</b>                                                                                                                  | <b>References</b> |
|----------------|-----------------------------------------------------------------------------------------------------------------------------------------|-------------------|
| YEplac181      | <i>S. cerevisiae-E. coli</i> shuttle vector, High-copy (2 $\mu$ ), <i>LEU2</i> , <i>Amp</i> <sup>R</sup>                                | 1                 |
| YEp352         | <i>S. cerevisiae-E. coli</i> shuttle vector, High-copy (2 $\mu$ ), <i>URA3</i> , <i>Amp</i> <sup>R</sup>                                | 2                 |
| p181-HPO       | YEplac181 derived, containing P <sub>GAL1</sub> - <i>HPO</i> -T <sub>CYC1</sub>                                                         | This study        |
| p181-mHPO      | YEplac181 derived, containing P <sub>GAL1</sub> - <i>mHPO</i> -T <sub>CYC1</sub>                                                        | This study        |
| p181-CnVO      | YEplac181 derived, containing P <sub>GAL1</sub> - <i>CnVO</i> -T <sub>CYC1</sub>                                                        | This study        |
| p181-HC        | YEplac181 derived, containing P <sub>GAL1</sub> - <i>HPO</i> -T <sub>CYC1</sub> and P <sub>GAL1</sub> - <i>AtCPR</i> -T <sub>CYC1</sub> | This study        |
| p352-CPR       | YEp352 derived, containing P <sub>GAL1</sub> - <i>AtCPR</i> -T <sub>CYC1</sub>                                                          | This study        |
| p352-HC        | YEp352 derived, containing P <sub>GAL1</sub> - <i>HPO</i> -T <sub>CYC1</sub> and P <sub>GAL1</sub> - <i>AtCPR</i> -T <sub>CYC1</sub>    | This study        |
| p352-HC2       | YEp352 derived, containing P <sub>HXT7</sub> - <i>HPO</i> -T <sub>TP1</sub> and P <sub>HXT7</sub> - <i>AtCPR</i> -T <sub>TP1</sub>      | This study        |
| p352-HC3       | YEp352 derived, containing P <sub>HXT7</sub> - <i>HPO</i> -T <sub>TP1</sub> and P <sub>CYC1</sub> - <i>AtCPR</i> -T <sub>CYC1</sub>     | This study        |

---

|            |                                                                                                                |            |
|------------|----------------------------------------------------------------------------------------------------------------|------------|
| p352-A1HC  | YEplac352 derived, containing $P_{TDH3-ADH1-T_{ADH1}}$ , $P_{GAL1-HPO-T_{CYC1}}$ and $P_{GAL1-AtCPR-T_{CYC1}}$ | This study |
| p352-A1HC3 | YEplac352 derived, containing $P_{TDH3-ADH1-T_{ADH1}}$ , $P_{HXT7-HPO-T_{TP1}}$ and $P_{CYC1-AtCPR-T_{CYC1}}$  | This study |
| p352-A3HC  | YEplac352 derived, containing $P_{TDH3-ADH3-T_{ADH1}}$ , $P_{GAL1-HPO-T_{CYC1}}$ and $P_{GAL1-AtCPR-T_{CYC1}}$ | This study |
| p181-V1    | YEplac181 derived, containing $P_{TDH3-VS-T_{ADH1}}$                                                           | This study |
| p181-V2    | YEplac181 derived, containing $P_{TEF1-VS-T_{ADH1}}$                                                           | This study |
| p181-V1V2  | YEplac181 derived, containing $P_{TDH3-VS-T_{ADH1}}$ and $P_{TEF1-VS-T_{ADH1}}$                                | This study |
| p181-V1H   | YEplac181 derived, containing $P_{TDH3-VS-T_{ADH1}}$ and $P_{TDH3-tHMG1-T_{ADH1}}$                             | This study |
| p181-V2H   | YEplac181 derived, containing $P_{TEF1-VS-T_{ADH1}}$ and $P_{TDH3-tHMG1-T_{ADH1}}$                             | This study |
| p181-V1HV2 | YEplac181 derived, containing $P_{TEF1-VS-T_{ADH1}}$ , $P_{TDH3-tHMG1-T_{ADH1}}$ and $P_{TEF1-VS-T_{ADH1}}$    | This study |

---

**Table S3. Strains used in this study.**

| Strain               | Parent strain | Plasmids/genotype                                                                                                                                                                                                                           | Sources                     |
|----------------------|---------------|---------------------------------------------------------------------------------------------------------------------------------------------------------------------------------------------------------------------------------------------|-----------------------------|
| <i>E. coli</i>       |               |                                                                                                                                                                                                                                             |                             |
| DH5 $\alpha$         |               | F <sup>-</sup> $\phi$ 80 <i>lacZ</i> $\Delta$ M15 $\Delta$ ( <i>lacZYA-argF</i> ) U169 <i>recA1 endA1 hsdR17</i><br>(r <sub>K</sub> <sup>-</sup> , m <sub>K</sub> <sup>+</sup> ) <i>phoA supE44 <math>\lambda</math> thi-1 gyrA96 relA1</i> | Invitrogen                  |
| <i>S. cerevisiae</i> |               |                                                                                                                                                                                                                                             |                             |
| CEN.PK2-1Ca          |               | <i>MATa trp1-289 leu2-3 leu2-112 ura3-52 his3<math>\Delta</math>1</i>                                                                                                                                                                       | ATCC® MYA-1108™             |
| BY4741               |               | <i>MAT<math>\alpha</math> his3<math>\Delta</math>1 leu2<math>\Delta</math>0 met15<math>\Delta</math>0 ura3<math>\Delta</math>0</i>                                                                                                          | Invitrogen                  |
| BJ5464               |               | <i>MAT<math>\alpha</math> ura3-52 trp1 leu2<math>\Delta</math>1 his3<math>\Delta</math>200 pep4::<i>HIS3</i> prb1<math>\Delta</math>1.6R</i><br><i>can1 GAL</i>                                                                             | ATCC® 208288™, <sup>3</sup> |
| PK2-C                | CEN.PK2-1Ca   | YEplac181 and YEp352                                                                                                                                                                                                                        | This study                  |
| PK2-01               | CEN.PK2-1Ca   | p181-HPO and p352-CPR                                                                                                                                                                                                                       | This study                  |

---

|        |             |                                            |            |
|--------|-------------|--------------------------------------------|------------|
| PK2-02 | CEN.PK2-1Ca | p181-mHPO and p352-CPR                     | This study |
| PK2-03 | CEN.PK2-1Ca | p181-CnVO and p352-CPR                     | This study |
| PK2-30 | CEN.PK2-1Ca | p181-HC                                    | This study |
| PK2-31 | CEN.PK2-1Ca | p352-HC                                    | This study |
| PK2-32 | CEN.PK2-1Ca | p352-A1HC                                  | This study |
| PK2-33 | CEN.PK2-1Ca | p352-A3HC                                  | This study |
| PK2-34 | CEN.PK2-1Ca | p352-HC2                                   | This study |
| PK2-35 | CEN.PK2-1Ca | p352-HC3                                   | This study |
| BY-32  | BY4741      | BY4741 with pYEp352-A1HC                   | This study |
| BJ-32  | BJ5464      | BJ5464 with pYEp352-A1HC                   | This study |
| PK2-11 | CEN.PK2-1Ca | p181-V1                                    | This study |
| PK2-12 | CEN.PK2-1Ca | p181-V1, <i>erg9::Δ-220--176 rox1::mut</i> | This study |

---

---

|        |             |                                                           |            |
|--------|-------------|-----------------------------------------------------------|------------|
| PK2-13 | CEN.PK2-1Ca | p181-V1H, <i>erg9::Δ-220--176 rox1::mut</i>               | This study |
| PK2-14 | CEN.PK2-1Ca | p181-V2H, <i>erg9::Δ-220--176 rox1::mut</i>               | This study |
| PK2-15 | CEN.PK2-1Ca | p181-V1HV2, <i>erg9::Δ-220--176 rox1::mut</i>             | This study |
| PK2-16 | CEN.PK2-1Ca | p181-V2H, <i>erg9::Δ-220--176 rox1::mut</i>               | This study |
| PK2-17 | CEN.PK2-1Ca | p181-V1V2                                                 | This study |
| PK2-18 | CEN.PK2-1Ca | p181-V1HV2, <i>erg9::Δ-220--176 rox1::mut</i>             | This study |
| PK2-19 | CEN.PK2-1Ca | p181-V1 and p352-A1HC                                     | This study |
| PK2-20 | CEN.PK2-1Ca | p181-V1 and p352-A1HC, <i>erg9::Δ-220--176 rox1::mut</i>  | This study |
| PK2-21 | CEN.PK2-1Ca | p181-V1H and p352-A1HC, <i>erg9::Δ-220--176 rox1::mut</i> | This study |
| PK2-22 | CEN.PK2-1Ca | p181-V2 and p352-A1HC                                     | This study |
| PK2-23 | CEN.PK2-1Ca | p181-V2 and p352-A1HC, <i>erg9::Δ-220--176 rox1::mut</i>  | This study |
| PK2-24 | CEN.PK2-1Ca | p181-V2H and p352-A1HC, <i>erg9::Δ-220--176 rox1::mut</i> | This study |

---

---

PK2-25

CEN.PK2-1Ca

p181-V2H and p352-A1HC3, *erg9::Δ-220--176 rox1::mut*

This study

---

**Table S4. The primers used in this study\*.**

| <b>Primers</b> | <b>Sequence (5'-3')</b>                       |
|----------------|-----------------------------------------------|
| Gal1-F1        | GTTACCGAATTCTTTACCGTCGACAGTACGGATTAGAAGCCGCC  |
| Gal1-R1        | GTTACCCTGCAGTTTACCCTCGAGGCAAATTAAGCCTTCGAGCGT |
| VS-U           | GTTACCGAGCTCGTTACCGGATCCATGGCTGAAATGTTCAACGGA |
| VS-D           | GAGCGATCTAGAGAGCGACCCGGGTTAGGGAATAATCGGTTCGAC |
| CnVO-U         | GTTACCGGATCCATGGACATGTCAACGATATGGT            |
| CnVO-D         | GAGCGACCCGGGTTATTCATATAAGTTGGGATATAACA        |
| HPO-U          | GTTACCGGATCCATGCAGTTCTTCTCACTGGTT             |
| HPO-D          | GAGCGACCCGGGTTATTCACGGGAGGGTTGATA             |
| AtCPR-F        | GTTACCGAGCTCGTTACCGGATCCATGACTTCTGCCTTGTATGCC |
| AtCPR-R        | GAGCGATCTAGAGAGCGACCCGGGTCACCAGACATCTCTCAAGTA |



---

|           |                                                  |
|-----------|--------------------------------------------------|
| TEF2-F    | GAGCGAGTCGACATTACCCATAAGGTTGTTTGT                |
| TEF2-R    | GTTACCGAGCTCGTTTAGTTAATTATAGTTCGTTG              |
| ADH1T-F   | GAGCGATCTAGAAGCTTTGGACTTCTTCGCCA                 |
| ADH1T-R   | TTTACACTCGAGCATAGGGTAGGGGAATTCGA                 |
| TDH3-F    | GAGCGAGTCGACACAGTTTATTCCTGGCATCC                 |
| TDH3-R    | GTTACCGAGCTCTTTGTTTGTATATGT                      |
| HPO-482UM | GAATTAGTTGGCATTACAATTGCCAGGAAATCCGA              |
| HPO-482DM | TCGGATTCCTGGCAATTGTAATGCCAACTAATTC               |
| ADH1-U    | GTTACCGAGCTCGTTACCGGATCCATGTCTATCCCAGAACTCAA     |
| ADH1-D    | GAGCGATCTAGAGAGCGACCCGGGTTATTTAGAAGTGTCAACAACGTA |
| ADH3-U    | GTTACCGAGCTCGTTACCGGATCCATGTTGAGAACGTCAACATTGT   |
| ADH3-D    | GAGCGATCTAGAGAGCGACCCGGGTTATTTACTAGTATCGACGACG   |

---

---

|            |                                                   |
|------------|---------------------------------------------------|
| tHMG1-U    | GTTACCGAGCTCGTTACCGGATCCATGGACCAATTGGTGAAAACCTGAA |
| tHMG1-D    | GAGCGATCTAGAGAGCGACCCGGGTTAGGATTTAATGCAGGTGAC     |
| ADH3-UM    | TGACATGCGAGTTCTGTGAATCA                           |
| ADH3-DM    | TGATTCACAGAACTCGCATGTCA                           |
| tHMG1-F    | GCCTGCAGTTTACCCTCGGGACAGTTTATTCCTGG               |
| tHMG1-R    | CTCCAGCTTTTGTCGTCGACCATAGGGTAGGGGAA               |
| TEF1-U     | GTCGACGACAAAAGCTGGAGCTCATAGCTTCAAAATGTTTCT        |
| Backbone-R | CCCGAGGGTAAACTGCAGGCATGCAAGCTTGGCGTAATC           |
| TEF1-U     | GTCGACGACAAAAGCTGGAGCTCATAGCTTCAAAATGTTTCT        |
| 2 $\mu$ -R | GTTCATAGGGTAGAATTAATTCTCATGTTTGACAGCTTATC         |
| 2 $\mu$ -F | TGATAAGCTGTCAAACATGAGAATTAATTCTACCCTATGA          |
| TEF1-R     | GAGCTCCAGCTTTTGTCGTCGACCCCGAGGGTAAACTGCAGGC       |

---

---

|           |                                                                    |
|-----------|--------------------------------------------------------------------|
| Tong-F    | <b>TAATAATGGTTTCTTAGTATGA</b>                                      |
| Tong-R    | <b>ACTAAGAAACCATTATTATCAT</b>                                      |
| ROX1-F    | <b>ACAGGATCTTAATAGACGAAGTTTTAGAGCTAGAAATA</b>                      |
| ROX1-R    | <b>TTCGTCTATTAAGATCCTGTGATCATTTATCTTTCCTG</b>                      |
| ERG9-F    | <b>TTTTCCACTGCACTTTGCATGTTTTAGAGCTAGAAATAGCA</b>                   |
| ERG9-R    | <b>ATGCAAAGTGCAGTGGAAAAGATCATTTATCTTTCCTG</b>                      |
| Tong2-F   | <b>GAACAAAAGCTGGAGCT</b>                                           |
| Vector2-R | <b>AGCTCCAGCTTTTGTTCAAGACATAAAAAACAAAAAAG</b>                      |
| Vector2-F | <b>TTAACCTCACTAAAGGTCTTTGAAAAGATAATGTATGA</b>                      |
| Tong2-R   | <b>CCTTTAGTGAGGGTTAA</b>                                           |
| ROX1-M-F  | <b>GCATTTATTCTGTTCCAGACAGCACTACCACAGGATCTTAATAGACGAATAACCGCTCA</b> |
|           | <b><u>A</u></b>                                                    |

---

---

|          |                                                                         |
|----------|-------------------------------------------------------------------------|
| ROX1-M-R | AAATGTTTGAATTATGGGGTATTTCCACACCTTGAGCGGTTATTCGTCTATTAAGATCC             |
| UAS-M-F  | CTCTGACTCAGTACATTTTCATAGCCCATCTTCAACAACAATACCGACTTATCGGAAGG<br><u>C</u> |
| UAS-M-R  | GCTCGTTTAGGCACTAAACCCAAAACCGATAACGCCTTCCGATAAGTCGGTATTGTT               |
| CYC1p-F  | GAGCGAGAATTCTTGGAAAACCAAGAAATG                                          |
| CYC1p-R  | TTTACCGAGCTCTATTAATTTAGTGTGTGTATTG                                      |
| CYC1t-F  | GAGCGACCCGGGGGGCCGCATCATGTAATTAG                                        |
| CYC1t-R  | GTTACCGGATCCGCAAATTAAGCCTTCGAG                                          |
| HXT7p-F  | GAGCGAGAATTCCTCGTAGGAAAAATTCGG                                          |
| HXT7p-R  | TTTACCGAGCTCTTTTTGATTAATAATTAATAAAAAACT                                 |
| TPI1t-F  | GAGCGACCCGGGGATTAATATAATTATATAAAAAATATTATCT                             |
| TPI1t-R  | GTTACCGGATCCCTATATAACAGTTGAAAT                                          |

---

---

|          |                                                    |
|----------|----------------------------------------------------|
| HPO-U1   | TTTACAGAGCTCATGCAGTTCTTCTCAC                       |
| HPO-D1   | TTTACACCCGGGTTATTCACGGGAGGGTT                      |
| AtCPR-F1 | GAGCGATCTAGAATGACTTCTGCCT                          |
| AtCPR-R1 | TTTACACTGCAGTCACCAGACATCTCTC                       |
| CAC-F    | <b>CAACTGTTATATAGGGATCCTTGGAAAACCAAGAAATGAATTA</b> |
| CAC-R    | <b>CGACGGCCAGTGCCAAGCTTGCAAATTAAGCCTTCGAG</b>      |
| HA-F     | <b>TTCCCCTACCCTATGCTCGTAGGAAAAATTCGGGC</b>         |
| HA-R     | <b>CAGTTTACCCTCGAGGCAAATTAAGCCTTCGAGC</b>          |

---

\*The homologous arms are indicated in bold, and the complementary sequences are underlined.

### References

- 1 Hill, J. E., Myers, A. M., Koerner, T. J. and Tzagoloff, A., *Yeast*, 1986, **2**, 163-167.
- 2 Gietz, R. D. and Akio, S., *Genes*, 1988, **74**, 527-534.
- 3 Jones, E. W., *Methods in enzymology*, 1991, **194**, 428-453.
